# Supplementary material
Source: publisher figshare collection journal article supplement (https://sage.figshare.com/ndownloader/files/12810701)
Supplement: Supplementary file 1 [file 12810701]

## Supplementary data

**Figure 3**

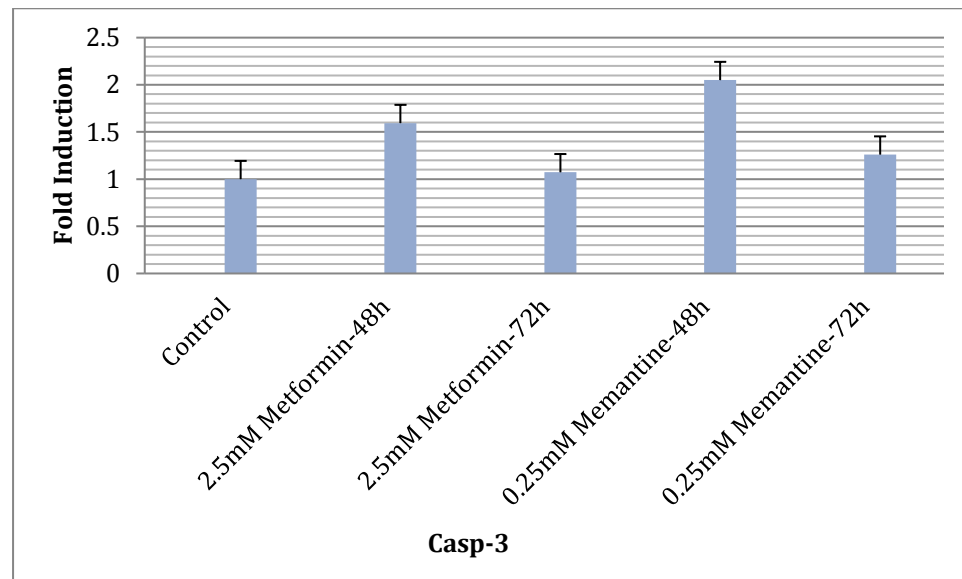

a. Casp-3 protein expression was assessed by Western blotting and the fold change was calculated relative to the untreated LNCaP cells. Fold changes were measured by ImageJ densitometric analysis for western blot signals.

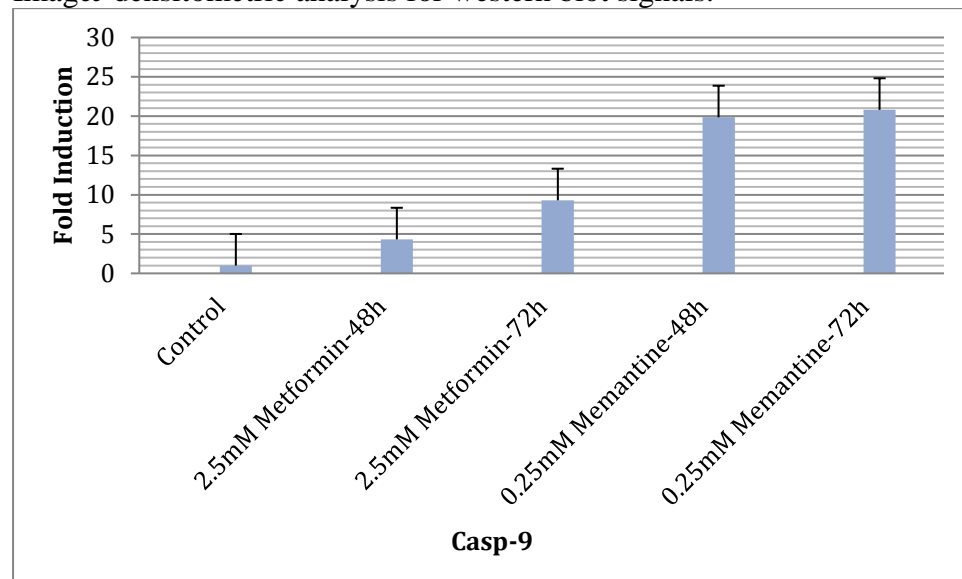

b. Casp-9 protein expression was assessed by Western blotting and the fold change was calculated relative to the untreated LNCaP cells. Fold changes were measured by ImageJ densitometric analysis for western blot signals.

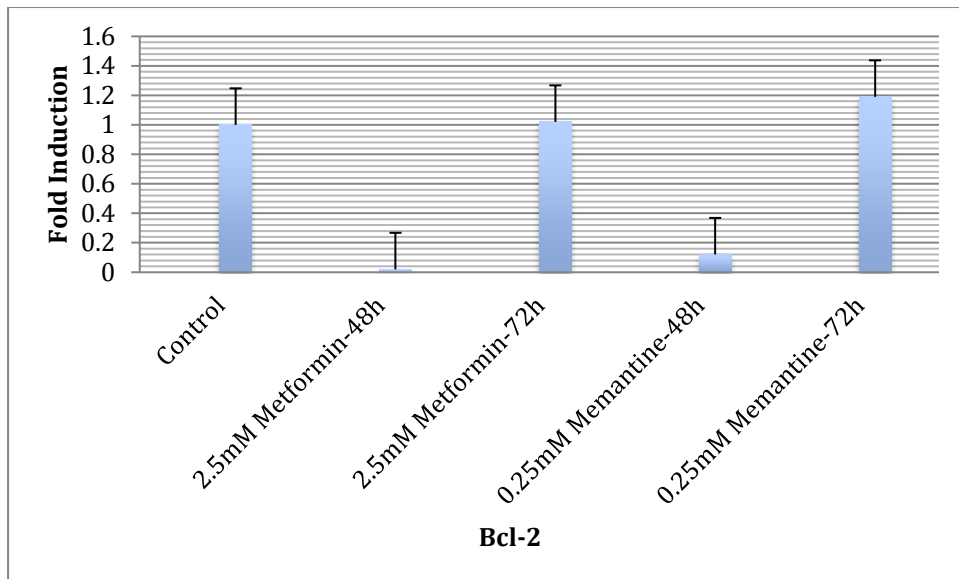

c. Bcl-2 protein expression was assessed by Western blotting and the fold change was calculated relative to the untreated LNCaP cells. Fold changes were measured by ImageJ densitometric analysis for western blot signals.

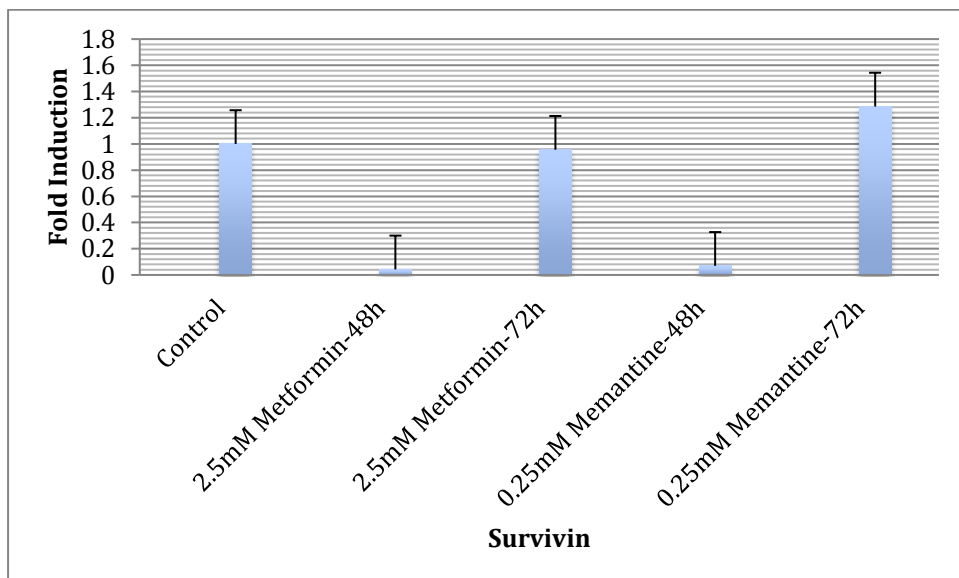

d. Survivin protein expression was assessed by Western blotting and the fold change was calculated relative to the untreated LNCaP cells. Fold changes were measured by ImageJ densitometric analysis for western blot signals.

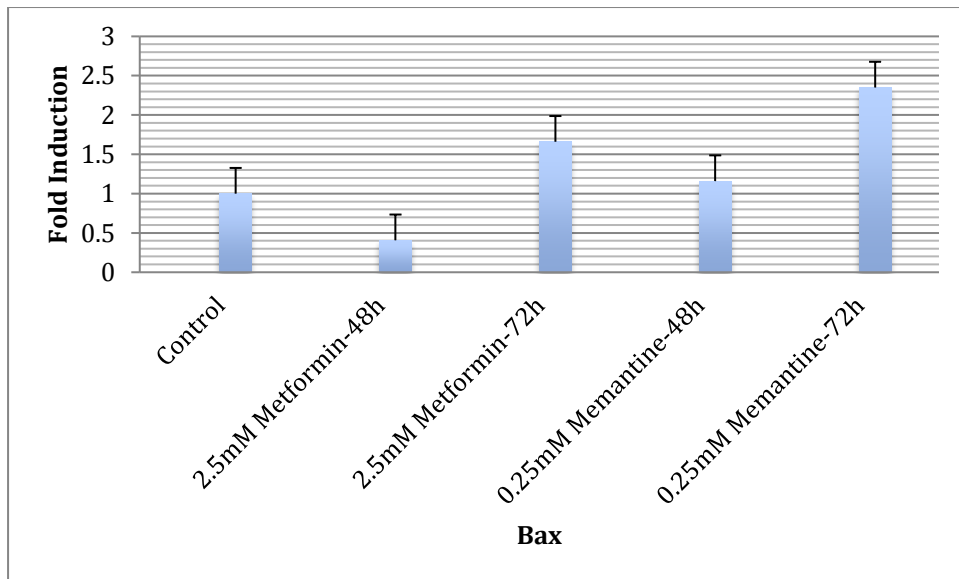

e. Bax protein expression was assessed by Western blotting and the fold change was calculated relative to the untreated LNCaP cells. Fold changes were measured by ImageJ densitometric analysis for western blot signals.

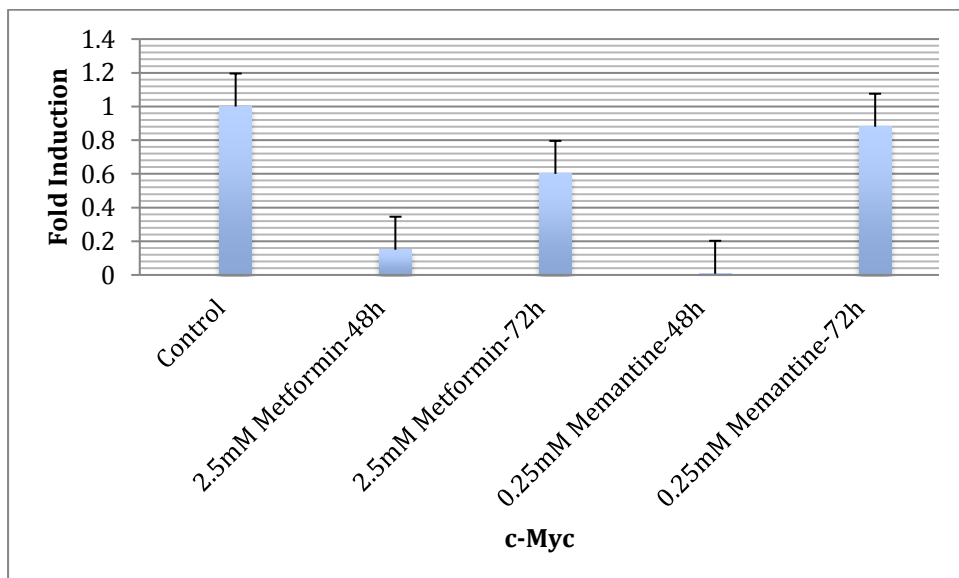

f. c-Myc protein expression was assessed by Western blotting and the fold change was calculated relative to the untreated LNCaP cells. Fold changes were measured by ImageJ densitometric analysis for western blot signals.

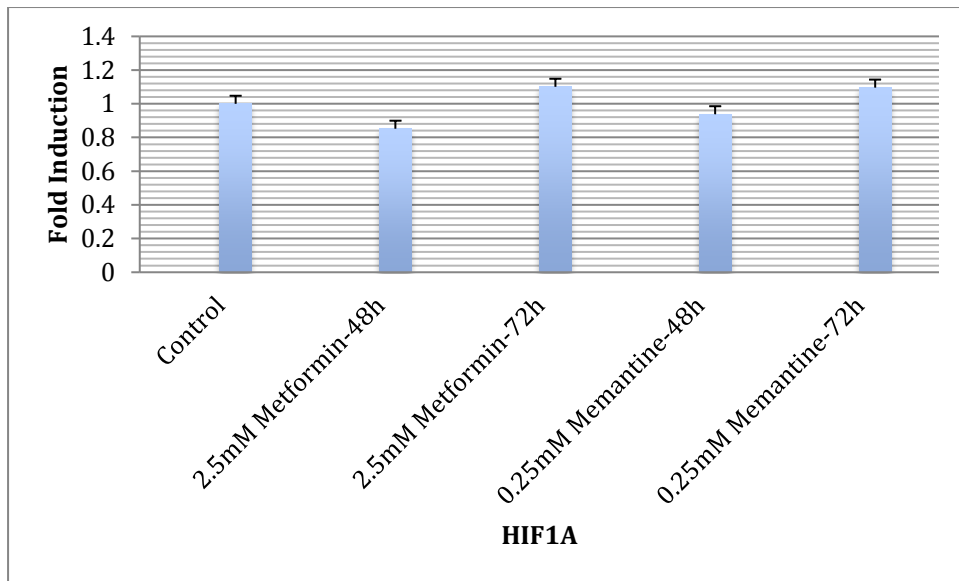

g. HIF1A protein expression was assessed by Western blotting and the fold change was calculated relative to the untreated LNCaP cells. Fold changes were measured by ImageJ densitometric analysis for western blot signals.

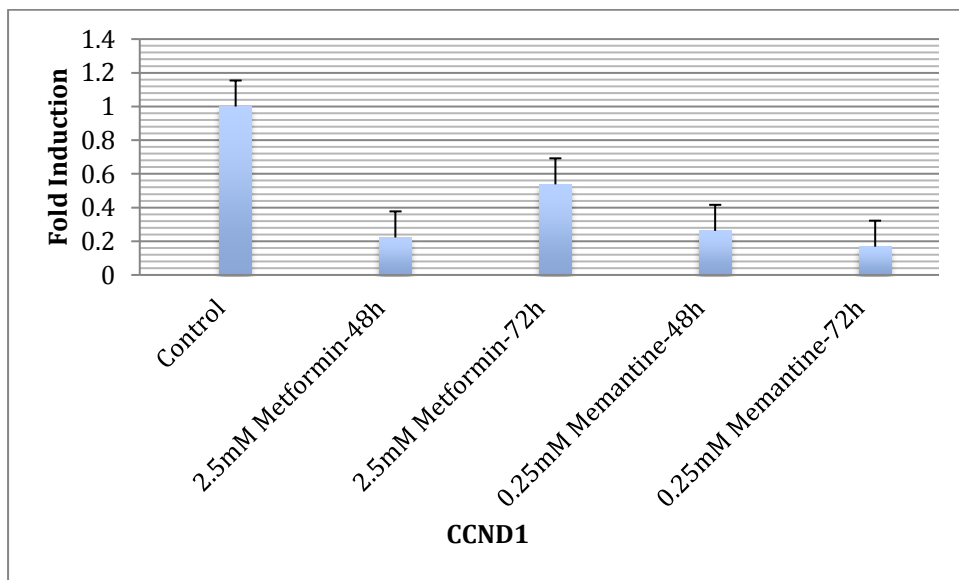

h. CCND1 protein expression was assessed by Western blotting and the fold change was calculated relative to the untreated LNCaP cells. Fold changes were measured by ImageJ densitometric analysis for western blot signals.

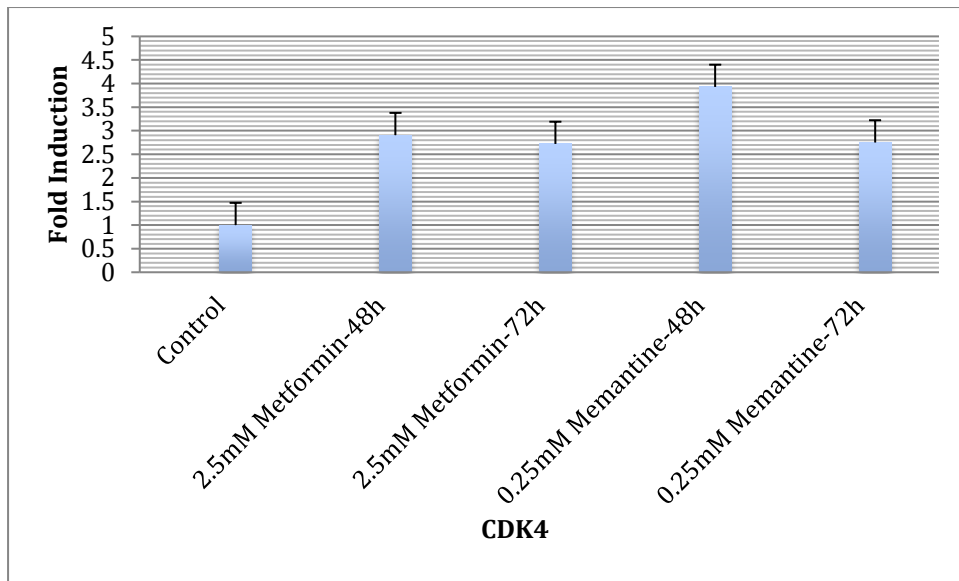

i. CDK4 protein expression was assessed by Western blotting and the fold change was calculated relative to the untreated LNCaP cells. Fold changes were measured by ImageJ densitometric analysis for western blot signals.
